# Supplementary material for: Experimental and Thermodynamic Viewpoints on Claims of a Spontaneous H2O2 Formation at the Air–Water Interface
Source: PubMed Central journal article supplement (PMC10041628; doi:10.1021/acs.jpcb.2c07394), 2023-03-13
Supplement: jp2c07394_si_001.pdf [file jp2c07394_si_001.pdf]

# Supporting information for “Experimental and Thermodynamic Viewpoints on Claims of a Spontaneous H<sub>2</sub>O<sub>2</sub> Formation at the Air-Water Interface”

*Duy Nguyen, Pin Lyu, and Son C. Nguyen\**

Department of Chemistry and Biochemistry, University of California, Merced, CA 95343,  
United States

Corresponding Author: [son@ucmerced.edu](mailto:son@ucmerced.edu)

**1. Standard Gibbs free energies of some reactions for H<sub>2</sub>O<sub>2</sub> formation in water solution and gas phase.**

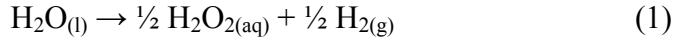

$$\Delta G^\circ = \frac{1}{2}(\Delta G_{\text{H}_2\text{O}_2, \text{aq}}^\circ + \Delta G_{\text{H}_2, \text{g}}^\circ) - \Delta G_{\text{H}_2\text{O}, l}^\circ = \frac{1}{2}(-134.1 \text{ kJ} \cdot \text{mol}^{-1} + 0 \text{ kJ} \cdot \text{mol}^{-1}) - (-237.1 \text{ kJ} \cdot \text{mol}^{-1}) = 170.0 \text{ kJ} \cdot \text{mol}^{-1} = 40.7 \text{ kcal} \cdot \text{mol}^{-1}$$

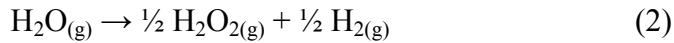

$$\Delta G^\circ = \frac{1}{2}(\Delta G_{\text{H}_2\text{O}_2, \text{g}}^\circ + \Delta G_{\text{H}_2, \text{g}}^\circ) - \Delta G_{\text{H}_2\text{O}, \text{g}}^\circ = \frac{1}{2}(-105.6 \text{ kJ} \cdot \text{mol}^{-1} + 0 \text{ kJ} \cdot \text{mol}^{-1}) - (-228.6 \text{ kJ} \cdot \text{mol}^{-1}) = 175.8 \text{ kJ} \cdot \text{mol}^{-1} = 42.1 \text{ kcal} \cdot \text{mol}^{-1}$$

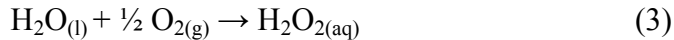

$$\Delta G^\circ = \Delta G_{\text{H}_2\text{O}_2, \text{aq}}^\circ - \left( \Delta G_{\text{H}_2\text{O}, l}^\circ + \frac{1}{2} \Delta G_{\text{O}_2, \text{g}}^\circ \right) = -134.1 \text{ kJ} \cdot \text{mol}^{-1} - \left( -237.1 \text{ kJ} \cdot \text{mol}^{-1} + \frac{1}{2} \times 0 \text{ kJ} \cdot \text{mol}^{-1} \right) = 103.0 \text{ kJ} \cdot \text{mol}^{-1} = 24.6 \text{ kcal} \cdot \text{mol}^{-1}$$

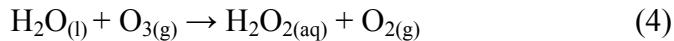

$$\Delta G^\circ = (\Delta G_{\text{H}_2\text{O}_2, \text{aq}}^\circ + \Delta G_{\text{O}_2, \text{g}}^\circ) - \left( \Delta G_{\text{H}_2\text{O}, l}^\circ + \frac{1}{2} \Delta G_{\text{O}_3, \text{g}}^\circ \right) = (-134.1 \text{ kJ} \cdot \text{mol}^{-1} + 0 \text{ kJ} \cdot \text{mol}^{-1}) - ((-237.1 \text{ kJ} \cdot \text{mol}^{-1}) + 163.2 \text{ kJ} \cdot \text{mol}^{-1}) = -60.2 \text{ kJ} \cdot \text{mol}^{-1} = -14.4 \text{ kcal} \cdot \text{mol}^{-1}$$

All the above data were extracted from Ref. 1

**2. Thermodynamic quantities of chemical species that may be relevant to H<sub>2</sub>O<sub>2</sub> formation**

Table S1. Thermodynamic quantities of chemical species that could be relevant to hydrogen peroxide formation

| Chemical species                                                                              |               | H <sub>2</sub> O            | •OH                                                                  | H <sub>2</sub> O <sub>2</sub>                                                                        | H <sub>2</sub>                                                     | H <sub>3</sub> O <sup>+</sup>                             | OH <sup>-</sup>                                                                                                     | e <sup>-</sup>                                                                    |                                                                                                      |
|-----------------------------------------------------------------------------------------------|---------------|-----------------------------|----------------------------------------------------------------------|------------------------------------------------------------------------------------------------------|--------------------------------------------------------------------|-----------------------------------------------------------|---------------------------------------------------------------------------------------------------------------------|-----------------------------------------------------------------------------------|------------------------------------------------------------------------------------------------------|
| Enthalpy of Formation<br>( $\Delta H_f^\circ$ , kJ·mol <sup>-1</sup> )                        | Gas phase     | -241.8 <sup>1</sup>         | 39.0 <sup>1</sup>                                                    | -136.3 <sup>1</sup>                                                                                  | 0                                                                  | 584.2 <sup>2</sup>                                        | -143.6 <sup>2</sup>                                                                                                 |                                                                                   |                                                                                                      |
|                                                                                               | Interface     |                             |                                                                      |                                                                                                      |                                                                    |                                                           |                                                                                                                     |                                                                                   |                                                                                                      |
|                                                                                               | Bulk          | -285.83<br>(l) <sup>1</sup> | -0.8 ± 5.9<br>(aq) <sup>3</sup>                                      | -187.8 (l) <sup>1</sup><br>-191.2 (aq) <sup>1</sup>                                                  |                                                                    | 144.3 (aq) <sup>4</sup>                                   | -230.0<br>(aq) <sup>1</sup>                                                                                         | 277.4<br>(aq) <sup>5</sup>                                                        |                                                                                                      |
| Gibbs Energy of Formation<br>( $\Delta G_f^\circ$ , kJ·mol <sup>-1</sup> )                    | Gas phase     | -228.6 <sup>1</sup>         | 34.2 <sup>1</sup>                                                    | -105.6 <sup>1</sup>                                                                                  | 0                                                                  | 606.6 <sup>2</sup>                                        | -138.7 <sup>2</sup>                                                                                                 |                                                                                   |                                                                                                      |
|                                                                                               | Interface     |                             |                                                                      |                                                                                                      |                                                                    |                                                           |                                                                                                                     |                                                                                   |                                                                                                      |
|                                                                                               | Bulk          | -237.1<br>(l) <sup>1</sup>  | 24.3<br>(aq) <sup>3</sup>                                            | -120.4 (l) <sup>1</sup><br>-134.1 (aq) <sup>1</sup>                                                  |                                                                    | 183.9<br>(aq) <sup>4</sup>                                | -157.3<br>(aq) <sup>1</sup>                                                                                         | 276.9<br>(aq) <sup>5</sup>                                                        |                                                                                                      |
| Entropy<br>( $S^\circ$ , J·K <sup>-1</sup> ·mol <sup>-1</sup> )                               | Gas phase     | 188.8 <sup>1</sup>          | 183.6 <sup>1</sup>                                                   | 232.7 <sup>1</sup>                                                                                   | 130.7 <sup>1</sup>                                                 | 192.3 <sup>2</sup>                                        | 172.5 <sup>2</sup>                                                                                                  |                                                                                   |                                                                                                      |
|                                                                                               | Interface     |                             |                                                                      |                                                                                                      |                                                                    |                                                           |                                                                                                                     |                                                                                   |                                                                                                      |
|                                                                                               | Bulk          | 69.9 <sup>1</sup>           |                                                                      | 109.6 (l) <sup>1</sup><br>143.9 (aq) <sup>1</sup>                                                    |                                                                    |                                                           | -10.9<br>(aq) <sup>1</sup>                                                                                          | 66.9<br>(aq) <sup>5</sup>                                                         |                                                                                                      |
| Solvation Energy*<br>(kJ·mol <sup>-1</sup> )                                                  | Gas phase     |                             |                                                                      |                                                                                                      |                                                                    |                                                           |                                                                                                                     |                                                                                   |                                                                                                      |
|                                                                                               | Interface     |                             | -17.3<br>(cal) <sup>6</sup><br>-16.74<br>(cal) <sup>7</sup>          | -43.9<br>(cal) <sup>8</sup>                                                                          |                                                                    | -424.7<br>(cal) <sup>9</sup>                              | -440.6<br>(stabilized by<br>1 $k_bT$ ) <sup>10</sup>                                                                | -154.4<br>(VBE, exp) <sup>11</sup>                                                |                                                                                                      |
|                                                                                               | Bulk          |                             | -29.8<br>(aq, cal) <sup>12</sup><br>-26.4<br>(aq, exp) <sup>13</sup> | -13.4<br>(aq, cal) <sup>6</sup><br>-12.5<br>(l, cal) <sup>7</sup><br>-16.32<br>(l, exp) <sup>7</sup> | -41.8<br>(aq, cal) <sup>8</sup><br>-36.6<br>(aq, exp) <sup>8</sup> | 9.2<br>(cal) <sup>14</sup><br>9.79<br>(exp) <sup>15</sup> | 651.0 (aq,<br>con, cal) <sup>16</sup><br>-461.5 (aq,<br>abs, cal) <sup>16</sup><br>-439.3<br>(aq, cal) <sup>9</sup> | -1550.6 (aq,<br>con, cal) <sup>16</sup><br>-438.1 (aq,<br>abs, cal) <sup>16</sup> | -164.8<br>(exp) <sup>17</sup><br>-148.5<br>(cal) <sup>18</sup><br>-318.4<br>(VBE, exp) <sup>11</sup> |
|                                                                                               |               |                             |                                                                      |                                                                                                      |                                                                    |                                                           |                                                                                                                     |                                                                                   |                                                                                                      |
| Henry's Law Constants<br>( $H_s^{cp}$ , mol <sup>-1</sup> ·m <sup>3</sup> ·Pa <sup>-1</sup> ) | Water solvent |                             | 0.38 <sup>19</sup>                                                   | 910 <sup>19</sup>                                                                                    | 7.80×10 <sup>-6</sup> <sup>19</sup>                                |                                                           |                                                                                                                     |                                                                                   |                                                                                                      |

|                                  |           |                                                                        |                                                                                                       |                                                                                                                                                                                  |                                                       |                                                      |                                                                  |
|----------------------------------|-----------|------------------------------------------------------------------------|-------------------------------------------------------------------------------------------------------|----------------------------------------------------------------------------------------------------------------------------------------------------------------------------------|-------------------------------------------------------|------------------------------------------------------|------------------------------------------------------------------|
| Ionization Energy (eV)           | Gas phase | 12.61 (exp) <sup>1</sup>                                               | 13.02 (cal) <sup>20</sup><br>13.02 (exp) <sup>21</sup>                                                | 10.64 (cal) <sup>22</sup><br>10.65 (exp) <sup>22</sup>                                                                                                                           | 15.32 (cal) <sup>23</sup><br>15.43 (exp) <sup>1</sup> | 1.90 (VDE, exp) <sup>24</sup>                        |                                                                  |
|                                  | Interface | 10.30 (cal) <sub>25</sub>                                              |                                                                                                       |                                                                                                                                                                                  |                                                       |                                                      |                                                                  |
|                                  | Bulk      | ~10 (exp) <sup>25</sup><br>10.55 (cal) <sup>25</sup>                   |                                                                                                       | 10.54 (aq, exp) <sup>26</sup>                                                                                                                                                    | 14.5 (cal) <sup>27</sup>                              | 9.20 (exp) <sup>27</sup><br>9.70 (cal) <sup>27</sup> | 3.3 (VBE, cal) <sup>28</sup><br>3.3-3.7 (VBE, exp) <sup>29</sup> |
| Standard Reduction Potential (V) | Gas phase |                                                                        |                                                                                                       |                                                                                                                                                                                  |                                                       |                                                      |                                                                  |
|                                  | Interface |                                                                        |                                                                                                       |                                                                                                                                                                                  |                                                       |                                                      |                                                                  |
|                                  | Bulk      | -0.8 (H <sub>2</sub> O/H <sub>2</sub> , OH <sup>-</sup> ) <sup>1</sup> | 2.7 (·OH, H <sup>+</sup> /H <sub>2</sub> O) <sup>30</sup><br>1.9 (·OH/OH <sup>-</sup> ) <sub>30</sub> | 0.8 (H <sub>2</sub> O <sub>2</sub> , H <sup>+</sup> /H <sub>2</sub> O, ·OH) <sup>30</sup><br>1.8 (H <sub>2</sub> O <sub>2</sub> , H <sup>+</sup> /H <sub>2</sub> O) <sub>1</sub> |                                                       |                                                      | -2.7 (aq/e <sub>aq</sub> <sup>-</sup> ) <sup>30</sup>            |

\*The absolute and conventional solvation free energies are presented. The absolute value of a single ion cannot be measured, the conventional value is therefore often tabulated by arbitrarily setting the free energy of solvation of the proton equal to zero.<sup>16</sup>

Note. water solvent unless specified, l – liquid, aq – aqueous, VBE – vertical binding energy, VDE – vertical detachment energy, abs – absolute, cal – calculated.

## References

- (1) James Speight, P. D. *Lange's Handbook of Chemistry, Sixteenth Edition*. 16th / ed.; McGraw-Hill Education: New York, 2005.
- (2) Chase, M. NIST-JANAF Thermochemical Tables, 4th Edition. American Institute of Physics, -1: 1998.
- (3) Autrey, T.; Brown, A. K.; Camaioni, D. M.; Dupuis, M.; Foster, N. S.; Getty, A. Thermochemistry of Aqueous Hydroxyl Radical from Advances in Photoacoustic Calorimetry and ab Initio Continuum Solvation Theory. *J. Am. Chem. Soc.* **2004**, *126*, 3680-3681.
- (4) Nikolai, B.; Manoj, K. M. Thermodynamics of Hydronium, Zundel and Eigen ions. *OSF Preprints* **2021**, doi:10.31219/osf.io/b6v24.
- (5) Schwarz, H. A. Enthalpy and Entropy of Formation of the Hydrated Electron. *J. Phys. Chem.* **1991**, *95*, 6697-6701.
- (6) Wick, C. D.; Dang, L. X. Computational Observation of Enhanced Solvation of the Hydroxyl Radical with Increased NaCl Concentration. *J. Phys. Chem. B* **2006**, *110*, 8917-8920.
- (7) Roeselová, M.; Vieceľi, J.; Dang, L. X.; Garrett, B. C.; Tobias, D. J. Hydroxyl Radical at the Air–Water Interface. *J. Am. Chem. Soc.* **2004**, *126*, 16308-16309.
- (8) Vácha, R.; Slaviček, P.; Mucha, M.; Finlayson-Pitts, B. J.; Jungwirth, P. Adsorption of Atmospherically Relevant Gases at the Air/Water Interface: Free Energy Profiles of Aqueous Solvation of N<sub>2</sub>, O<sub>2</sub>, O<sub>3</sub>, OH, H<sub>2</sub>O, HO<sub>2</sub>, and H<sub>2</sub>O<sub>2</sub>. *J. Phys. Chem. A* **2004**, *108*, 11573-11579.
- (9) Dang, L. X. Solvation of the Hydronium Ion at the Water Liquid/Vapor Interface. *J. Chem. Phys.* **2003**, *119*, 6351-6353.
- (10) Mundy, C. J.; Kuo, I. F. W.; Tuckerman, M. E.; Lee, H.-S.; Tobias, D. J. Hydroxide Anion at the Air–Water Interface. *Chem. Phys. Lett.* **2009**, *481*, 2-8.
- (11) Siefertmann, K. R.; Liu, Y.; Lugovoy, E.; Link, O.; Faubel, M.; Buck, U.; Winter, B.; Abel, B. Binding Energies, Lifetimes and Implications of Bulk and Interface Solvated Electrons in Water. *Nat. Chem.* **2010**, *2*, 274-279.
- (12) Feldt, J.; Miranda, S.; Pratas, F.; Roma, N.; Tomás, P.; Mata, R. A. Optimization and Benchmarking of a Perturbative Metropolis Monte Carlo Quantum Mechanics/Molecular Mechanics Program. *J. Chem. Phys.* **2017**, *147*, 244105.
- (13) Ben-Naim, A.; Marcus, Y. Solvation Thermodynamics of Nonionic Solutes. *J. Chem. Phys.* **1984**, *81*, 2016-2027.
- (14) Sabo, D.; Varma, S.; Martin, M. G.; Rempe, S. B. Studies of the Thermodynamic Properties of Hydrogen Gas in Bulk Water. *J. Phys. Chem. B* **2008**, *112*, 867-876.
- (15) Young, C. L. *Hydrogen and Deuterium*. Pergamon: Oxford, England, 1981.
- (16) Kelly, C. P.; Cramer, C. J.; Truhlar, D. G. Aqueous Solvation Free Energies of Ions and Ion–Water Clusters Based on an Accurate Value for the Absolute Aqueous Solvation Free Energy of the Proton. *J. Phys. Chem. B* **2006**, *110*, 16066-16081.
- (17) Noyes, R. M. Assignment of Individual Ionic Contributions to Properties of Aqueous Ions. *J. Am. Chem. Soc.* **1964**, *86*, 971-979.
- (18) Zhan, C.-G.; Dixon, D. A. The Nature and Absolute Hydration Free Energy of the Solvated Electron in Water. *J. Phys. Chem. B* **2003**, *107*, 4403-4417.
- (19) Sander, R. Compilation of Henry's Law Constants (version 4.0) for Water as Solvent. *Atmos. Chem. Phys.* **2015**, *15*, 4399-4981.
- (20) Ruscic, B.; Wagner, A. F.; Harding, L. B.; Asher, R. L.; Feller, D.; Dixon, D. A.; Peterson, K. A.; Song, Y.; Qian, X.; Ng, C.-Y.; Liu, J.; Chen, W.; Schwenke, D. W. On the Enthalpy of Formation of Hydroxyl Radical and Gas-Phase Bond Dissociation Energies of Water and Hydroxyl. *J. Phys. Chem. A* **2002**, *106*, 2727-2747.
- (21) Wiedmann, R. T.; Tonkyn, R. G.; White, M. G.; Wang, K.; McKoy, V. Rotationally Resolved Threshold Photoelectron Spectra of OH and OD. *J. Chem. Phys.* **1992**, *97*, 768-772.
- (22) Changala, P. B.; Nguyen, T. L.; Baraban, J. H.; Ellison, G. B.; Stanton, J. F.; Bross, D. H.; Ruscic, B. Active Thermochemical Tables: The Adiabatic Ionization Energy of Hydrogen Peroxide. *J. Phys. Chem. A* **2017**, *121*, 8799-8806.

- (23) III, R. D. J. NIST Computational Chemistry Comparison and Benchmark Database. Release 22, May 2022, ed.; The National Institute of Standards and Technology (NIST) NIST Standard Reference Database Number 101, 2022; p DOI:10.18434/T47C7Z. <http://cccbdb.nist.gov/>.
- (24) Kang, M.; Park, C. J.; Kim, H. M.; Lee, S. H. Photoelectron Spectroscopy of OH<sup>-</sup>-Anion–Water Clusters Generated by Ultrasonic Nebulizer. *Int. J. Mol. Sci.* **2022**, *23*, 4175.
- (25) Gaiduk, A. P.; Pham, T. A.; Govoni, M.; Paesani, F.; Galli, G. Electron Affinity of Liquid Water. *Nat. Commun.* **2018**, *9*, 247.
- (26) Brown, R. S. A Photoelectron Investigation of the Peroxide Bond. *Can. J. Chem.* **1975**, *53*, 3439-3447.
- (27) Winter, B.; Faubel, M.; Hertel, I. V.; Pettenkofer, C.; Bradforth, S. E.; Jagoda-Cwiklik, B.; Cwiklik, L.; Jungwirth, P. Electron Binding Energies of Hydrated H<sub>3</sub>O<sup>+</sup> and OH<sup>-</sup>: Photoelectron Spectroscopy of Aqueous Acid and Base Solutions Combined with Electronic Structure Calculations. *J. Am. Chem. Soc.* **2006**, *128*, 3864-3865.
- (28) Coe, J. V.; Lee, G. H.; Eaton, J. G.; Arnold, S. T.; Sarkas, H. W.; Bowen, K. H.; Ludewigt, C.; Haberland, H.; Worsnop, D. R. Photoelectron Spectroscopy of Hydrated Electron Cluster Anions, (H<sub>2</sub>O)<sub>n=2-69</sub><sup>-</sup>. *J. Chem. Phys.* **1990**, *92*, 3980-3982.
- (29) Nishitani, J.; Yamamoto, Y.-i.; West, C. W.; Karashima, S.; Suzuki, T. Binding Energy of Solvated Electrons and Retrieval of True UV Photoelectron Spectra of Liquids. *Sci. Adv.* **2019**, *5*, eaaw6896.
- (30) Wardman, P. Reduction Potentials of One-Electron Couples Involving Free Radicals in Aqueous Solution. *J. Phys. Chem. Ref. Data* **1989**, *18*, 1637-1755.
